# Supplementary material for: Transcranial photobiomodulation for brain diseases: review of animal and human studies including mechanisms and emerging trends
Source: PubMed Central journal article supplement (PMC10840571; doi:10.1117/1.nph.11.1.010601), 2024-02-05
Supplement: NPh_011_010601_SD001.pdf [file NPh_011_010601_SD001.pdf]

## Supplementary Material

# **Transcranial photobiomodulation for brain diseases: Review of animal and human studies including mechanisms and emerging trends**

**Hao Lin,<sup>a,†</sup> Dongyu Li,<sup>a,b,†</sup> Jingtian Zhu,<sup>a</sup> Shaojun Liu,<sup>a</sup> Jingting Li,<sup>c</sup> Tingting Yu,<sup>a</sup> Valery V. Tuchin,<sup>d,e,f</sup> Oxana Semyachkina-Glushkovskaya,<sup>d,g,\*</sup> Dan Zhu<sup>a,\*</sup>**

<sup>a</sup>Huazhong University of Science and Technology, Wuhan National Laboratory for Optoelectronics - Advanced Biomedical Imaging Facility, Britton Chance Center for Biomedical Photonics, Wuhan, Hubei 430074, China

<sup>b</sup>Huazhong University of Science and Technology, School of Optical Electronic Information, Wuhan, Hubei 430074, China

<sup>c</sup>Huazhong University of Science and Technology, School of Engineering Sciences, Wuhan, Hubei 430074, China

<sup>d</sup>Saratov State University, Science Medical Center, Astrakhanskaya str 83, Saratov 410012, Russia

<sup>e</sup>Research Center of Biotechnology of the Russian Academy of Sciences, Bach Institute of Biochemistry, Moscow 119071, Russia

<sup>f</sup>Tomsk State University, Laboratory of Laser Molecular Imaging and Machine Learning, Tomsk 634050, Russia

<sup>g</sup>Humboldt University, Physics Department, Newtonstrasse 15, Berlin 12489, Germany

Tables S1 – S11

**Table S1. Reports of tPBM used for ischemic stroke in pre-clinical and clinical studies.**

| Authors/<br>year                   | Animal/<br>species                                                    | Pathological<br>model                                       | Parameters of<br>the light used                                                                                                                                   | Protocol                                                                                                                                       | Effects                                                                                                                                                                                                                                                                                                                                                                                                                                                                    |
|------------------------------------|-----------------------------------------------------------------------|-------------------------------------------------------------|-------------------------------------------------------------------------------------------------------------------------------------------------------------------|------------------------------------------------------------------------------------------------------------------------------------------------|----------------------------------------------------------------------------------------------------------------------------------------------------------------------------------------------------------------------------------------------------------------------------------------------------------------------------------------------------------------------------------------------------------------------------------------------------------------------------|
| Lee et al.<br>[51]<br>(2016)       | Male<br>C57BL/6J<br>mouse                                             | Photothrombotic<br>model                                    | LED; 610 nm;<br>20 min<br>1.7 mW/cm <sup>2</sup> on<br>the scalp<br>Spot diameter:<br>4 mm<br>2.0 J/cm <sup>2</sup> on the<br>scalp                               | Twice a day for<br>2 days prior to<br>stroke                                                                                                   | <ol style="list-style-type: none"> <li>1. Reduced infarct size and edema, and improved neurological scores.</li> <li>2. Inhibited gliosis and decreased the level of pro-inflammatory cytokines.</li> <li>3. Inhibited mitogen-activated protein kinase activation and nuclear factor-κB translocation.</li> <li>4. Prevented the destruction of BBB.</li> </ol>                                                                                                           |
| Lee et al.<br>[54]<br>(2017)       | Male<br>C57BL/6J<br>mouse                                             | Photothrombotic<br>model                                    | LED; 610 nm;<br>20 min<br>1.7 mW/cm <sup>2</sup> on<br>the scalp<br>Spot diameter:<br>4 mm<br>2.0 J/cm <sup>2</sup> on the<br>scalp                               | Twice a day for<br>2 days prior to<br>stroke                                                                                                   | <ol style="list-style-type: none"> <li>1. Inhibited the infiltration of neutrophils.</li> <li>2. Decreased the number of TUNEL<sup>+</sup>/PI<sup>+</sup> cells and the expression of cleaved Caspase-1 and Caspase-11.</li> <li>3. Inhibited the expression of NLRP3 inflammatory body.</li> </ol>                                                                                                                                                                        |
| Lee et al.<br>[55]<br>(2017)       | Male<br>C57BL/6J<br>mouse                                             | Photothrombotic<br>model                                    | LED; 610 nm;<br>20 min<br>1.7 mW/cm <sup>2</sup> on<br>the scalp<br>Spot diameter:<br>4 mm<br>2.0 J/cm <sup>2</sup> on the<br>scalp                               | Once a day for<br>7 days<br>immediately<br>(acute treatment<br>group) or from<br>forth day<br>(subacute<br>treatment<br>group) after<br>stroke | <ol style="list-style-type: none"> <li>1. Improved motor function 28 days after ischemic stroke in both treatment groups.</li> <li>2. tPBM (subacute treatment) increased BrdU<sup>+</sup>/GFAP<sup>+</sup> and decreased BrdU<sup>+</sup>/Iba-1<sup>+</sup> expression in the cortex.</li> <li>3. tPBM (subacute treatment) promoted the proliferation and differentiation of neuronal cells.</li> <li>4. tPBM with subacute treatment upregulated BDNF level.</li> </ol> |
| Lee et al.<br>[53]<br>(2017)       | Male<br>C57BL/6J<br>mouse and<br>Male<br>eNOS <sup>-/-</sup><br>mouse | Middle cerebral<br>artery occlusion/reperfusion<br>(MCAO/R) | LED; 610 nm;<br>20 min<br>1.7 mW/cm <sup>2</sup> on<br>the scalp<br>Spot diameter:<br>4 mm<br>2.0 J/cm <sup>2</sup> on the<br>scalp                               | Twice a day for<br>2 days prior to<br>stroke                                                                                                   | <ol style="list-style-type: none"> <li>1. Pretreatment reduced infarct size and edema, and improved neurological scores and motor function.</li> <li>2. Partially recovered cerebral blood flow after reperfusion.</li> <li>3. Activated PI3K/Akt pathway, upregulated eNOS phosphorylation, and promoted the generation of NO.</li> </ol>                                                                                                                                 |
| Kim et<br>al. [52]<br>(2022)       | Male<br>C57BL/6J<br>mouse                                             | Photothrombotic<br>model                                    | LED; 630 or<br>850 or 940 nm;<br>20 min;<br>17 mW/cm <sup>2</sup> on<br>the scalp                                                                                 | Twice a day for<br>3 days before<br>stroke (scheme<br>1) or twice a<br>day for 3 days<br>after stroke<br>(scheme 2)                            | <ol style="list-style-type: none"> <li>1. tPBM (630 nm) with scheme 1 reduced cortex infarct size, recovered behavioral function, increased the expression of CD31<sup>+</sup> and decreased the expression of Iba-1<sup>+</sup> and GFAP<sup>+</sup>.</li> <li>2. tPBM (630 nm) attenuated AIM2 inflammasome activation and inflammasome-mediated pyroptosis.</li> </ol>                                                                                                  |
| Leung et<br>al. [56]<br>(2002)     | Male<br>Sprague-<br>Dawley rat                                        | Middle cerebral<br>artery occlusion<br>(MCAO)               | Laser; 660 nm<br>1 or 5 or 10 min<br>Spot size:<br>20 mm <sup>2</sup><br>44 mW/cm <sup>2</sup><br>2.64 or 13.2 or<br>26.4 J/cm <sup>2</sup><br>PW mode:<br>10 kHz | Single treatment<br>immediately<br>after stroke                                                                                                | <ol style="list-style-type: none"> <li>1. Reduced the activity of NOS and its subtypes (i.e. eNOS, iNOS and nNOS) with dose dependency.</li> <li>2. Triggered the expression of TGF-β1.</li> </ol>                                                                                                                                                                                                                                                                         |
| Oron et<br>al. [58]<br>(2006)      | Male<br>Sprague-<br>Dawley rat                                        | MCAO                                                        | Laser; 808 nm<br>7.5 mW/cm <sup>2</sup> on<br>the cortex<br>0.9 J/cm <sup>2</sup> on the<br>cortex<br>PW (70 Hz) or<br>CW                                         | Single treatment<br>from 4 hours<br>(scheme 1) or<br>24h (scheme 2)<br>after stroke                                                            | <ol style="list-style-type: none"> <li>1. tPBM with scheme 2 improved neurological scores.</li> <li>2. tPBM (scheme 1) with PW mode had a better motor improvement effect than CW mode treatment 28 days after stroke.</li> <li>3. tPBM with CW mode had a better neurogenesis effect than PW mode treatment.</li> </ol>                                                                                                                                                   |
| DeTaboada et al.<br>[62]<br>(2006) | Sprague-<br>Dawley rat                                                | MCAO                                                        | Laser; 808 nm<br>7.5 mW/cm <sup>2</sup> on<br>the cortex<br>0.9 J/cm <sup>2</sup> on the<br>cortex                                                                | Single treatment<br>at ipsilateral<br>(scheme 1) or<br>contralateral<br>(scheme 2) or<br>both sides<br>(scheme 3) of<br>ischemic region        | <ol style="list-style-type: none"> <li>1. tPBM, especially scheme 2, improved modified neurological scores.</li> </ol>                                                                                                                                                                                                                                                                                                                                                     |
| Yang et<br>al. [60]<br>(2018)      | Male<br>Sprague-<br>Dawley rat                                        | Photothrombotic<br>model                                    | LED; 808 nm;<br>2 min                                                                                                                                             | Once a day for<br>7 days from 24                                                                                                               | <ol style="list-style-type: none"> <li>1. Improved motor ability.</li> <li>2. Reduced infarct area and increased the number of surviving neurons in the cortex.</li> </ol>                                                                                                                                                                                                                                                                                                 |

|                            |                               |                                                                               |                                                                                                                                                                                                 |                                                                                                                 |                                                                                                                                                                                                                                                                                                                                                                                                                                                                                                                          |
|----------------------------|-------------------------------|-------------------------------------------------------------------------------|-------------------------------------------------------------------------------------------------------------------------------------------------------------------------------------------------|-----------------------------------------------------------------------------------------------------------------|--------------------------------------------------------------------------------------------------------------------------------------------------------------------------------------------------------------------------------------------------------------------------------------------------------------------------------------------------------------------------------------------------------------------------------------------------------------------------------------------------------------------------|
|                            |                               |                                                                               | 350 mW/cm <sup>2</sup> on the scalp<br>25 mW/cm <sup>2</sup> on the cortex                                                                                                                      | hours after stroke                                                                                              | <ol style="list-style-type: none"> <li>3. Inhibited the damage of dendrites and synapses.</li> <li>4. Increased the expression level of stem cell proliferation markers (e.g. Ki67) and immature neuron markers (e.g. DCX) in the infarction region.</li> <li>5. Increased CCO activity and ATP levels.</li> <li>6. Decreased the expression level of proinflammatory cytokines (e.g. TNF-<math>\alpha</math>) and promoted the transformation of microglia phenotype from M1 to M2.</li> </ol>                          |
| Wang et al. [59] (2019)    | Male Sprague-Dawley rat       | Global cerebral ischemia induced by embolic bilateral common carotid arteries | Laser; 808 nm<br>Spot size: 1 cm <sup>2</sup><br>8 mW/cm <sup>2</sup> on the hippocampus<br>1 or 2 or 3 or 4 J                                                                                  | Once a day for 14 days                                                                                          | <ol style="list-style-type: none"> <li>1. tPBM with dose of 3 or 4 J mitigated neuron death in hippocampal CA1 region.</li> <li>2. Attenuated hippocampal-dependent short-term (1 week) and long-term (6 months) behavioral deficits.</li> <li>3. Preserved mitochondrial dynamics and suppressed substantial mitochondrial fragmentation of hippocampal CA1 neurons.</li> <li>4. Reduced mitochondrial oxidative damage, restored mitochondrial overall health status, and preserved mitochondrial function.</li> </ol> |
| Fonseca et al. [61] (2019) | Wistar rat                    | Electrolytic damage of electrode induced                                      | LED; 904 nm;<br>63 s<br>7 J/cm <sup>2</sup>                                                                                                                                                     | Once a day for 7 days (scheme 1) or 21 days (scheme 2)                                                          | <ol style="list-style-type: none"> <li>1. tPBM with scheme 2 improved muscle resistance.</li> <li>2. tPBM with both schemes mitigated anxiety condition.</li> <li>3. tPBM with both schemes promoted neurogenesis.</li> </ol>                                                                                                                                                                                                                                                                                            |
| Vogel et al. [57] (2021)   | Male Wistar rat               | Photothrombotic model                                                         | LED; 780 nm;<br>2 min<br>0.083 W/cm <sup>2</sup> on the scalp<br>10 J/cm <sup>2</sup> on the scalp                                                                                              | 3 times per week for 60 days from 24 hours after stroke                                                         | <ol style="list-style-type: none"> <li>1. Increased the number of GFAP<sup>+</sup> cells and decreased the number of Iba-1<sup>+</sup> cells.</li> <li>2. Reduced the expression level of proinflammatory cytokines TNF-<math>\alpha</math>, IL-1<math>\beta</math> and IL-6.</li> <li>3. No further positive effects combined with anti-inflammatory medicine <math>\Omega</math>-3 treatment.</li> </ol>                                                                                                               |
| Lapchak et al. [63] (2004) | Rabbit                        | Rabbit small clot embolic stroke model (RSCEM)                                | Laser; 808 nm<br>Dose 1:<br>7.5 mW/cm <sup>2</sup> on the cortex<br>0.9 J/cm <sup>2</sup> on the cortex<br>Dose 2:<br>25 mW/cm <sup>2</sup> on the cortex<br>15 J/cm <sup>2</sup> on the cortex | Single treatment from 1 (scheme 1) or 3 (scheme 2) or 6 (scheme 3) hours after stroke                           | <ol style="list-style-type: none"> <li>1. tPBM (scheme 1 and 2) with low dose (dose 1) more efficiently mitigated motor impairment.</li> <li>2. tPBM (scheme 3) with high dose (dose 2) more efficiently mitigated motor impairment.</li> </ol>                                                                                                                                                                                                                                                                          |
| Lapchak et al. [67] (2007) | Male new zealand white rabbit | RSCEM                                                                         | Laser; 808 nm;<br>2 min<br>Spot diameter: 2 cm<br>7.5 mW/cm <sup>2</sup> on the cortex<br>CW or PW 1 (1 kHz, 30%) or PW 2 (100 Hz, 20%)                                                         | Single treatment from 6 hours after stroke (scheme 1) or single treatment from 12 hours after stroke (scheme 2) | <ol style="list-style-type: none"> <li>1. tPBM (PW 1 and 2 modes) improved clinical rating scores.</li> </ol>                                                                                                                                                                                                                                                                                                                                                                                                            |
| Lapchak et al. [68] (2008) | Male new zealand white rabbit | RSCEM                                                                         | Laser; 808 nm;<br>2 min<br>10 mW/cm <sup>2</sup> on the cortex<br>1.2 J/cm <sup>2</sup> on the cortex                                                                                           | Single treatment from 90 min after stroke                                                                       | <ol style="list-style-type: none"> <li>1. tPBM could be combined with tPA for stroke treatment.</li> <li>2. No abnormal mortality and bleeding were observed.</li> </ol>                                                                                                                                                                                                                                                                                                                                                 |
| Lapchak et al. [65] (2010) | Male new zealand white rabbit | RSCEM                                                                         | Laser; 808 nm;<br>2 min<br>CW: 7.5 mW/cm <sup>2</sup> on the cortex<br>PW 1: 37.5 mW/cm <sup>2</sup> on the cortex<br>100 Hz<br>PW 2: 262.5 mW/cm <sup>2</sup> on the cortex                    | Single treatment from 5 min after stroke                                                                        | <ol style="list-style-type: none"> <li>1. tPBM with PW mode (especially PW 2) more effectively rescued ATP level in the cortex than CW mode.</li> </ol>                                                                                                                                                                                                                                                                                                                                                                  |

|                                  |                               |       |                                                                                                                                                                                                                                                                         |                                                                                                                                                                                                                     |                                                                                                                                                                                                                                                                                                           |
|----------------------------------|-------------------------------|-------|-------------------------------------------------------------------------------------------------------------------------------------------------------------------------------------------------------------------------------------------------------------------------|---------------------------------------------------------------------------------------------------------------------------------------------------------------------------------------------------------------------|-----------------------------------------------------------------------------------------------------------------------------------------------------------------------------------------------------------------------------------------------------------------------------------------------------------|
| Huisa et al. [64] (2013)         | Male new zealand white rabbit | RSCEM | 100 Hz<br>Laser; 808 nm;<br>2 min                                                                                                                                                                                                                                       | Single (scheme 1) or double (scheme 2) or triple (scheme 3) treatments after stroke                                                                                                                                 | 1. Improved neurological function scores with treatment times dependency.                                                                                                                                                                                                                                 |
| Lapchak et al. [69] (2016)       | Male new zealand white rabbit | RSCEM | Laser; 808 nm<br>7.5 mW/cm <sup>2</sup> on the cortex<br>0.9 J/cm <sup>2</sup> on the cortex                                                                                                                                                                            | Single treatment from 1 hour after stroke                                                                                                                                                                           | 1. Improved motor function and increased ATP levels in ischemic cortex.<br>2. Had a better therapeutic effect combined with tPA treatment.                                                                                                                                                                |
| Meyer et al. [66] (2016)         | Male new zealand white rabbit | RSCEM | Laser; 808 nm;<br>2 min<br>CW: 7.5 or 10.8 or 20 or 55.6 mW/cm <sup>2</sup> on the cortex<br>PW: 55.6 or 111 or 333 mW/cm <sup>2</sup> on the cortex<br>10 or 100Hz                                                                                                     | Single (scheme 1) or triple (scheme 2) treatment from 2 hours after stroke                                                                                                                                          | 1. 100 Hz-laser treatment with dose of 111 mW/cm <sup>2</sup> was safe, and had best motor improvement effect.<br>2. Exists biphasic effect.                                                                                                                                                              |
| Lampl et al. [20] (2007)         | Human                         | –     | Laser; 808 nm;<br>6 min<br>1 J/cm <sup>2</sup> on the cortex                                                                                                                                                                                                            | Single treatment at 20 predetermined sites within 24h of stroke                                                                                                                                                     | 1. Improved Bnih measure score, mRs score, Barthel index and Glasgow outcome scale.<br>2. Had no adverse effect on mortality and serious adverse event.                                                                                                                                                   |
| Zivin et al. [21] (2009)         | Human                         | –     | Laser; 808 nm;<br>2 min                                                                                                                                                                                                                                                 | Single treatment at 20 predetermined sites within 24h of stroke                                                                                                                                                     | 1. Not significantly improved modified Rankin Scale score and National Institutes of Health Stroke Scale score.                                                                                                                                                                                           |
| Hacke et al. [70] (2014)         | Human                         | –     | Laser; 808 nm;<br>2 min                                                                                                                                                                                                                                                 | Single treatment at 20 predetermined sites within 24h of stroke                                                                                                                                                     | 1. No beneficial effects were observed.<br>2. The trial was aborted.                                                                                                                                                                                                                                      |
| Naeser et al. [22] (2020)        | Human                         | –     | LED;<br>633 and 870 nm<br>500 mW<br>Spot size:<br>22.48 cm <sup>2</sup><br>22.2 mW/cm <sup>2</sup> on the scalp                                                                                                                                                         | 3 times per week for 6 weeks                                                                                                                                                                                        | 1. tPBM (6 weeks) improved the naming ability of chronic stroke patients when it was applied only to the left side of the head/scalp - e.g., the same side of the head, as where the stroke had occurred.<br>2. No improvement occurred when tPBM was applied to both sides of the head.                  |
| Estrada-Rojas et al. [23] (2023) | Human                         | –     | Device 1:<br>LED; 630, 660 and 850 nm<br>Spot size: 4.9 cm <sup>2</sup><br>200 mW/cm <sup>2</sup> on the scalp<br>12 J/cm <sup>2</sup> on the scalp<br>Device 2:<br>LED; 810 nm;<br>20 min<br>24 mW/cm <sup>2</sup> on the scalp<br>28.8 J/cm <sup>2</sup> on the scalp | Usage of device 1 and device 2 together for 5 months<br>Device 1 :<br>applied for 60 s over each of the eight, left hemisphere language network target areas<br>Device 2:<br>applied to both hemispheres for 10 min | 1. During the initial, 5-month treatment series with traditional speech-language therapy only, there was little to no improvement in dysarthria and expressive language.<br>2. tPBM plus speech-language therapy effectively improved the speech-language skills in the second, 5-month treatment series. |

**Table S2. Reports of tPBM used for HI in pre-clinical studies.**

| Authors/<br>year          | Animal/<br>species                   | Pathological<br>model                                                                         | Parameters of the<br>light used                                                                                                  | Protocol                                                  | Effects                                                                                                                                                                                                                                                                                                                                                                                                                                                                                                                                                                                                 |
|---------------------------|--------------------------------------|-----------------------------------------------------------------------------------------------|----------------------------------------------------------------------------------------------------------------------------------|-----------------------------------------------------------|---------------------------------------------------------------------------------------------------------------------------------------------------------------------------------------------------------------------------------------------------------------------------------------------------------------------------------------------------------------------------------------------------------------------------------------------------------------------------------------------------------------------------------------------------------------------------------------------------------|
| Tucker et al. [72] (2018) | Unsexed Sprague-Dawley rat pup (P10) | Unilateral permanent occlusion of the right common carotid artery following hypoxic treatment | Laser; 808 nm; 2 min<br>Spot size: 1 cm <sup>2</sup><br>25 mW/cm <sup>2</sup> on the cortex<br>3 J/cm <sup>2</sup> on the cortex | Once a day for 7 days                                     | <ol style="list-style-type: none"> <li>1. Decreased hemispheric brain shrinkage and neuronal cell death.</li> <li>2. Mitigated mitochondrial fragmentation, attenuated mitochondrial membrane collapse, and enhanced ATP synthesis.</li> <li>3. Decreased 4-Hydroxynonenal and malondialdehyde levels.</li> <li>4. Suppressed the activation of mitochondria-dependent neuronal apoptosis.</li> </ol>                                                                                                                                                                                                   |
| Yang et al. [73] (2019)   | Unsexed Sprague-Dawley rat pup (P10) | Unilateral permanent occlusion of the right common carotid artery following hypoxic treatment | Laser; 808 nm<br>Spot size: 1 cm <sup>2</sup><br>100 mW/cm <sup>2</sup> on the scalp<br>12 J/cm <sup>2</sup> on the scalp        | Single treatment from 6 hours before HI                   | <ol style="list-style-type: none"> <li>1. Alleviated memory-related behavioral deficit.</li> <li>2. Decreased brain shrinkage volume, protected neuron and synaptic injury.</li> <li>3. Improved mitochondrial dynamics in hippocampal CA1 neurons.</li> <li>4. Increased the expression level of CCO in mitochondria and cytosol.</li> <li>5. Decreased the activity of Caspase-9 and Caspase-3, and inhibited the neuronal apoptosis.</li> </ol>                                                                                                                                                      |
| Yang et al. [71] (2021)   | Unsexed Sprague-Dawley rat pup (P10) | Unilateral permanent occlusion of the right common carotid artery following hypoxic treatment | Laser; 808 nm; 2 min<br>8 mW/cm <sup>2</sup> on the scalp                                                                        | 3 times per week from gestation day 1 to gestation day 21 | <ol style="list-style-type: none"> <li>1. Improved survival rate and decreased infarct size.</li> <li>2. Alleviated cortex and hippocampus related behavioral deficits.</li> <li>3. Attenuated synaptic injury, dendritic injury, white matter injury, neuronal degeneration and neuronal apoptosis.</li> <li>4. Preserved CCO activity and ATP production; Protected mitochondrial dynamics and mitochondrial membrane potential.</li> <li>5. Promoted the shift of glial cells phenotype from pro-inflammatory to anti-inflammatory, and suppressed pro-inflammatory cytokines production.</li> </ol> |

**Table S3. A report of tPBM used for intracerebral hemorrhage in a pre-clinical study.**

| Authors/<br>year            | Animal/<br>species                                                         | Pathological<br>model                                                                             | Parameters of the<br>light used                                                                                                     | Protocol                                                                                                        | Effects                                                                                                                                                                                                                                                                                                                                                       |
|-----------------------------|----------------------------------------------------------------------------|---------------------------------------------------------------------------------------------------|-------------------------------------------------------------------------------------------------------------------------------------|-----------------------------------------------------------------------------------------------------------------|---------------------------------------------------------------------------------------------------------------------------------------------------------------------------------------------------------------------------------------------------------------------------------------------------------------------------------------------------------------|
| Li et al.<br>[74]<br>(2023) | Male<br>BALB/C<br>mouse and<br>male<br>postnatal<br>newborn<br>Wistar rats | Injections of 10<br>$\mu$ l autologous<br>blood into the<br>right lateral<br>ventricle<br>induced | Laser; 1267 nm;<br>51 min<br>Spot diameter:<br>5 mm<br>60 J/cm <sup>2</sup> on the<br>scalp<br>9 J/cm <sup>2</sup> on the<br>cortex | Immediately<br>treatment: once<br>immediately<br>after IVH long-<br>term treatment:<br>once a day for 7<br>days | 1. Immediately treatment increased the average diameter of basal MLVs and promoted the RBCs evacuation from ventricle to dcLNs.<br>2. Long-term treatment decreased intracranial pressure and mortality, and improved depression-like behavior.<br>3. tPBM-mediated stimulation of nitric oxide production improves the cleansing function of the basal MLVs. |

**Table S4. Reports of tPBM used for AD in pre-clinical and clinical studies.**

| Authors/<br>year                             | Animal/<br>species                         | Pathological<br>model                                             | Parameters of the<br>light used                                                                                                            | Protocol                                                    | Effects                                                                                                                                                                                                                                                                                                                                                                                                                                                                                                                                        |
|----------------------------------------------|--------------------------------------------|-------------------------------------------------------------------|--------------------------------------------------------------------------------------------------------------------------------------------|-------------------------------------------------------------|------------------------------------------------------------------------------------------------------------------------------------------------------------------------------------------------------------------------------------------------------------------------------------------------------------------------------------------------------------------------------------------------------------------------------------------------------------------------------------------------------------------------------------------------|
| Grillo et al. [83] (2013)                    | Female mouse (2 months old)                | TASTPM transgenic model                                           | LED; 1072 nm; 6 min<br>5 mW/cm <sup>2</sup> on the scalp<br>600 Hz                                                                         | Once a day for 5 months                                     | <ol style="list-style-type: none"> <li>1. Increased HSP60, HSP70 and HSP105 and phosphorylated-HSP27 levels.</li> <li>2. Decreased aB-crystallin, APP, tau-P, A<math>\beta</math><sub>1-40</sub> and A<math>\beta</math><sub>1-42</sub> levels.</li> <li>3. Decreased A<math>\beta</math><sub>1-40/42</sub> and A<math>\beta</math><sub>1-42</sub> plaque deposition in the cortex.</li> </ol>                                                                                                                                                 |
| Yue et al. [81] (2019)                       | Male mouse (4-6 months old)                | APP/PS1 transgenic model                                          | LED; 630 nm; 40 min<br>0.55 mW/cm <sup>2</sup> on the scalp                                                                                | 5 days per week for 2 consecutive months                    | <ol style="list-style-type: none"> <li>1. Not only destroyed A<math>\beta</math> assembly but also activated formaldehyde (FA) dehydrogenase to degrade FA and attenuated FA-facilitated A<math>\beta</math> aggregation.</li> <li>2. Smashed A<math>\beta</math> deposition in the extracellular space, recovered the flow of interstitial fluid, and rescued cognitive function in AD mouse models.</li> </ol>                                                                                                                               |
| Zinchenko et al. [79] (2019)                 | Male BALB/C mouse                          | Injection of A $\beta$ <sub>(1-42)</sub> peptide in the CA1 field | Laser; 1267 nm; 51 min<br>Spot diameter: 5 mm<br>18 or 25 or 32 or 39 J/cm <sup>2</sup> on the cortex                                      | Once a day for 9 days from 3 days after A $\beta$ injection | <ol style="list-style-type: none"> <li>1. tPBM with dose of 32 J/cm<sup>2</sup> did not induce obvious change of scalp temperature and tissue morphology.</li> <li>2. Decreased cerebral A<math>\beta</math> burden and promoted A<math>\beta</math> accumulation in dcLNs.</li> <li>3. Improved NSS, motor function and memory function.</li> </ol>                                                                                                                                                                                           |
| Zhang et al. [80] (2020)                     | Male C57BL/6 mouse (6 months old)          | APP/PS1 transgenic model                                          | Laser; 635 nm; 10 min<br>Spot size: 0.785 cm <sup>2</sup><br>2 J/cm <sup>2</sup> on the hippocampus and 6 J/cm <sup>2</sup> on the cortex  | Once a day for 30 days                                      | <ol style="list-style-type: none"> <li>1. Rescued spatial learning and memory deficits.</li> <li>2. Deduced A<math>\beta</math> production and plaque formation by shifting amyloid precursor protein (APP) processing toward the nonamyloidogenic pathway, which is CCO-dependent.</li> </ol>                                                                                                                                                                                                                                                 |
| Shen et al. [82] (2021)                      | Male C57BL/6 mouse (6 months old)          | APP/PS1 transgenic model                                          | Laser; 635 nm; 10 min<br>Spot size: 0.785 cm <sup>2</sup><br>2 J/cm <sup>2</sup> on the hippocampus and 6 J/cm <sup>2</sup> on the cortex  | Once a day for 30 days                                      | <ol style="list-style-type: none"> <li>1. Mitigated neuronal damage, A<math>\beta</math> burden and neuroinflammation.</li> <li>2. Rescued spatial learning and memory deficits.</li> <li>3. Attenuated A<math>\beta</math>-induced synaptic dysfunction and neuronal death.</li> </ol>                                                                                                                                                                                                                                                        |
| Semyachkina-Glushkovskaya et al. [78] (2021) | Male BALB/C mouse                          | Injection of A $\beta$ <sub>(1-42)</sub> peptide in the CA1 field | Laser; 1267 nm; 51 min<br>Spot diameter: 5 mm<br>9 J/cm <sup>2</sup> on the scalp<br>3 J/cm <sup>2</sup> on the cortex                     | Once a day for 9 days from 3 days after A $\beta$ injection | <ol style="list-style-type: none"> <li>1. tPBM, especially at night, decreased cerebral A<math>\beta</math> burden, improved memory and learning functions, and facilitated A<math>\beta</math> transport from brain to dcLNs.</li> </ol>                                                                                                                                                                                                                                                                                                      |
| Tao et al. [75] (2021)                       | Female C57BL/6J mouse (6 or 12 months old) | APP/PS1 transgenic model                                          | LED; 1070 nm; 6 min<br>25 mW/cm <sup>2</sup> on the scalp<br>10 Hz or 40 Hz (50%)<br>4.5 J/cm <sup>2</sup> on the scalp                    | Once a day for 60 days                                      | <ol style="list-style-type: none"> <li>1. tPBM at 10 Hz mitigated cognitive and memory impairments in 12 months old AD mouse models.</li> <li>2. tPBM at 10 Hz reduced cerebral A<math>\beta</math> burden by activating microglia.</li> <li>3. tPBM at 10 Hz decreased the number of cortical M1-like microglia that around blood vessels in 6 months old AD mouse models.</li> <li>4. tPBM at 10 Hz mitigated the decrease of vascular density and length in 6 months AD mouse models by regulating VGEF level.</li> </ol>                   |
| Lu et al. [76] (2017)                        | Male Sprague-Dawley rat                    | Injection of A $\beta$ <sub>(1-42)</sub> peptide in the CA1 field | Laser; 808 nm; 2 min<br>Spot size: 1 cm <sup>2</sup><br>25 mW/cm <sup>2</sup> on the cortex and 8.33 mW/cm <sup>2</sup> on the hippocampus | Once a day for 5 days                                       | <ol style="list-style-type: none"> <li>1. Mitigated neuronal degeneration in hippocampus CA1 region.</li> <li>2. Improved mitochondrial function and dynamics.</li> <li>3. Promoted CCO activity and adenosine triphosphate synthesis.</li> <li>4. Suppressed glucose-6-phosphate dehydrogenase and nicotinamide adenine dinucleotide phosphate oxidase activity</li> <li>5. Enhanced total antioxidant capacity and reduced oxidative damage.</li> <li>6. Suppressed reactive gliosis, inflammation, and tau hyperphosphorylation.</li> </ol> |

|                              |                                                                            |                            |                                                                                                                                                                                                                                               |                                                                                                                                                                      |                                                                                                                                                                                                                                                                                                                                                                                                                                                                                                                                                                                                                                                                                                        |
|------------------------------|----------------------------------------------------------------------------|----------------------------|-----------------------------------------------------------------------------------------------------------------------------------------------------------------------------------------------------------------------------------------------|----------------------------------------------------------------------------------------------------------------------------------------------------------------------|--------------------------------------------------------------------------------------------------------------------------------------------------------------------------------------------------------------------------------------------------------------------------------------------------------------------------------------------------------------------------------------------------------------------------------------------------------------------------------------------------------------------------------------------------------------------------------------------------------------------------------------------------------------------------------------------------------|
| Yang et al. [77] (2022)      | Male Fischer 344 rat (2 months old)                                        | TgF344-AD transgenic model | LED; 808 nm; 2 min<br>Spot size: 1.5 cm <sup>2</sup><br>350 mW/cm <sup>2</sup> on the scalp and 25 mW/cm <sup>2</sup> on the cortex<br>42 J/cm <sup>2</sup> on the scalp and 3 J/cm <sup>2</sup> on the cortex                                | 3 times per week from 2 months to 18 months old                                                                                                                      | <ol style="list-style-type: none"> <li>1. Rescued spatial learning and memory deficits.</li> <li>2. Ameliorated neuronal injury, neuronal apoptosis and degeneration, and alleviated the damage to spine synapses and dendritic spines.</li> <li>3. Attenuated amyloid load and abnormal tau hyperphosphorylation.</li> <li>4. Recruited microglia surrounding amyloid plaques by astrocytic IL-3 and microglial IL-3R<math>\alpha</math>.</li> <li>5. Regulated the phenotype of glial cells and suppresses neuroinflammation.</li> <li>6. Preserved mitochondrial dynamics, and alleviated oxidative stress.</li> <li>7. Neuronal hemoglobin mediates the neuroprotective effect of tPBM.</li> </ol> |
| Berman et al. [28] (2017)    | Human                                                                      | –                          | LED; 1070 nm; 6 min<br>10 Hz (50 %)                                                                                                                                                                                                           | Once a day for 28 consecutive days                                                                                                                                   | <ol style="list-style-type: none"> <li>1. Improved executive function in clock drawing, immediate recall, visual attention and task switching tests.</li> <li>2. Not significantly improved EEG amplitude and connectivity measures.</li> </ol>                                                                                                                                                                                                                                                                                                                                                                                                                                                        |
| Saltmarck et al. [25] (2017) | Human (The participants had scores from 10 to 24/30 on the MMSE at Entry.) | –                          | Intranasal device:<br>LED; 810 nm; 25 min<br>10 Hz (50 %)<br>14.2 mW/cm <sup>2</sup><br>Transcranial-intranasal device:<br>LED; 810 nm; 20 min<br>10 Hz (50 %)<br>41 mW/cm <sup>2</sup> (transcranial);<br>23 mW/cm <sup>2</sup> (intranasal) | Treated at home: once daily with the intranasal applicator only for the entire 12 weeks.<br>Received in-office: once a week, transcranial plus intranasal treatment. | <ol style="list-style-type: none"> <li>1. The Mini-Mental State Exam baseline and Alzheimer's Disease Assessment Scale scores were improved after 12 weeks PBM, but precipitous declines were observed during the follow-up no-treatment, 4-week period.</li> </ol>                                                                                                                                                                                                                                                                                                                                                                                                                                    |
| Chao et al. [26] (2019)      | Human                                                                      | –                          | Transcranial-intranasal device:<br>LED; 810 nm; 20 min<br>40 Hz (50 %)<br>60 J/cm <sup>2</sup> (posterior headband);<br>45 J/cm <sup>2</sup> (anterior headband);<br>15 J/cm <sup>2</sup> (intranasal LED)                                    | 3 times per week for 12 weeks                                                                                                                                        | <ol style="list-style-type: none"> <li>1. Improved Alzheimer's Disease Assessment Scale-cognitive subscale and Neuropsychiatric Inventory scores after treatment.</li> <li>2. Increased cerebral perfusion.</li> <li>3. Increased connectivity between the posterior cingulate cortex and lateral parietal nodes within the default-mode network.</li> </ol>                                                                                                                                                                                                                                                                                                                                           |
| Salehpour et al. [27] (2019) | Human                                                                      | –                          | Transcranial device:<br>LED; 635 and 810 nm; 25 min<br>Intranasal device:<br>LED; 810 nm; 25 min<br>10 Hz (50 %)<br>Body pad device:<br>635 and 810 nm; LED; 25 min                                                                           | Twice per day for 4 weeks<br>Week 1: transcranial and body pad devices PBM<br>Week 2-4: transcranial, body pad and intranasal PBM                                    | <ol style="list-style-type: none"> <li>1. Improved Montreal Cognitive Assessment score from 18 to 24 and Working Memory Questionnaire score from 53 to 10.</li> <li>2. Mitigated olfactory dysfunction as measured by Alberta Smell test and peanut butter odor detection test.</li> <li>3. No adverse effects were reported.</li> </ol>                                                                                                                                                                                                                                                                                                                                                               |



**Table S5. Reports of tPBM used for PD in pre-clinical and clinical studies.**

| Authors/<br>year                  | Animal/<br>species                                                    | Pathological<br>model                                                                                                                       | Parameters of the<br>light used                                                                                                      | Protocol                                                                                                       | Effects                                                                                                                                                                                                                                                                          |
|-----------------------------------|-----------------------------------------------------------------------|---------------------------------------------------------------------------------------------------------------------------------------------|--------------------------------------------------------------------------------------------------------------------------------------|----------------------------------------------------------------------------------------------------------------|----------------------------------------------------------------------------------------------------------------------------------------------------------------------------------------------------------------------------------------------------------------------------------|
| Shaw et al. [84] (2010)           | Male<br>BALB/C<br>mouse (8 weeks old)                                 | Injecting of 25 mg/kg MPTP two or four times within 30 hours induced                                                                        | LED; 670 nm; 90 s<br>Spot size: 10 cm <sup>2</sup><br>40 mW/cm <sup>2</sup> on the scalp                                             | Immediately after each injection of MPTP                                                                       | 1. Rescued the loss of TH <sup>+</sup> cell in the SNc, but had no effect in ZI-Hyp.                                                                                                                                                                                             |
| Peoples et al. [85] (2012)        | Male<br>BALB/C<br>mouse (8 weeks old)                                 | Injection of 20 mg/kg MPTP two times per week for 5 weeks induced                                                                           | LED; 670 nm; 90 s<br>5 J/cm <sup>2</sup> on the scalp                                                                                | Immediately after each injection of MPTP (scheme 1) or in total 10 times during the survival period (scheme 2) | 1. tPBM with both schemes mitigated the loss of dopaminergic cell in the SNc, but had no effect in PaG and ZI-Hyp.                                                                                                                                                               |
| Peoples et al. [86] (2012)        | Male<br>BALB/C<br>mouse (8 weeks old)                                 | Injecting of 25 mg/kg MPTP four times within 30 hours (acute model) or 20 mg/kg MPTP two times per week for 5 weeks (chronic model) induced | LED; 670 nm; 90 s<br>0.5 J/cm <sup>2</sup> on the cortex                                                                             | Received 15 min after each MPTP injection (scheme 1) or from fourth day after the last injection (scheme 2)    | 1. tPBM with both schemes saved the damage of dopaminergic amacrine cell of the retina in acute and chronic PD mouse models.                                                                                                                                                     |
| Shaw et al. [87] (2012)           | Male<br>BALB/C<br>mouse (8 weeks old)                                 | Injection of MPTP induced acute and chronic models                                                                                          | LED; 670 nm; 90 s<br>0.5 J/cm <sup>2</sup> on the cortex                                                                             | Received within 15 min after each MPTP injection                                                               | 1. Suppressed the increase of Fos <sup>+</sup> cell in subthalamic nucleus and zona incerta in acute and chronic PD models, which was concurrent with the neuroprotection of TH <sup>+</sup> cell in the SNc.                                                                    |
| Moro et al. [89] (2013)           | Male<br>BALB/C<br>mouse and Male<br>C57BL/6<br>mouse (8-10 weeks old) | Injecting of 25 mg/kg MPTP two times within 24 hours induced                                                                                | LED; 670 nm; 90 s<br>0.5 J/cm <sup>2</sup> on the cortex                                                                             | Immediately and from sixth hour after each injection of MPTP                                                   | 1. Rescued the loss of TH <sup>+</sup> cell in the SNc in the BALB/C strain mice, but had no protection effect in the C57BL/6 strain mice.                                                                                                                                       |
| Purushot human et al. [94] (2013) | Male<br>C57BL/6<br>mouse (5 months old)                               | K3 transgenic mouse model                                                                                                                   | LED; 670 nm; 90 s<br>4 J/cm <sup>2</sup> on the scalp                                                                                | 5 times per weeks for 4 weeks                                                                                  | 1. Reduced oxidative stress makers (e.g. 4-HNE) and hyperphosphorylated tau levels in the SNc.<br>2. Mitigated TH <sup>+</sup> cell loss in the SNc.                                                                                                                             |
| Johnstone et al. [96] (2014)      | Male<br>BALB/C<br>mouse (8 weeks old)                                 | Injection of 25 mg/kg MPTP per day for 2 or 3 or 4 days induced                                                                             | LED; 670 nm; 90 s<br>50 mW/cm <sup>2</sup> on the scalp<br>4 J/cm <sup>2</sup> on the scalp<br>Delivery mode: transcranial or dorsum | Immediately (scheme 1) or from sixth day (scheme 2) after each MPTP injection                                  | 1. Dorsum tPBM with both schemes rescued TH <sup>+</sup> cell loss in the SNc induced by total dose of 50 mg/kg MPTP. However, this effect was not as robust as transcranial irradiation.<br>2. There was no protective effect of tPBM at a high MPTP dose (100 mg/kg in total). |
| Reinhart et al. [88] (2015)       | Male<br>BALB/C<br>mouse (8-10 weeks old)                              | Injecting of 25 mg/kg MPTP two times within 24 hours induced                                                                                | LED; 810 nm; 90 s                                                                                                                    | 4 times treatment immediately (scheme 1) or from sixth hour (scheme 2) after each injecting of MPTP            | 1. Rescued the behavioral activity from the first treatment.<br>2. Rescued the loss of TH <sup>+</sup> cell in the SNc.                                                                                                                                                          |
| San Miguel et al. [90] (2019)     | Male<br>C57BL/6<br>mouse (12 weeks old)                               | Injecting of 20 mg/kg MPTP for 4 times, with a period of 2 h interval induced                                                               | LED; 670 nm; 3 min<br>50 mW/cm <sup>2</sup>                                                                                          | Once a day for 7 days, commencing 24 h following MPTP injections                                               | 1. Mitigated MPTP-induced cerebrovascular leakage in the SNc and caudate-putamen complex at 7 days post-injection.                                                                                                                                                               |
| Oueslati et al. [93] (2015)       | Female<br>Sprague-Dawley rat                                          | Adeno associated virus based genetic model                                                                                                  | Laser; 808 nm; 100 s<br>Spot size: 2 cm <sup>2</sup><br>2.5 or 5 mW/cm <sup>2</sup>                                                  | Once a day for 28 days                                                                                         | 1. tPBM with dose of 0.5 J/cm <sup>2</sup> suppressed motor deficit, rescued the loss of TH <sup>+</sup> cell in the SNc, and preserved dopaminergic fiber in the ipsilateral striatum.<br>2. Above beneficial effects were still existing 42 days after treatment.              |

|                             |                                        |                                                              |                                                                                                                                   |                                                                                                        |                                                                                                                                                                                                                                                                                                                                                                                                                                                   |
|-----------------------------|----------------------------------------|--------------------------------------------------------------|-----------------------------------------------------------------------------------------------------------------------------------|--------------------------------------------------------------------------------------------------------|---------------------------------------------------------------------------------------------------------------------------------------------------------------------------------------------------------------------------------------------------------------------------------------------------------------------------------------------------------------------------------------------------------------------------------------------------|
| Salgado et al. [92] (2016)  | Wistar rat                             | Bilateral microinjections 6-OHDA into the substantia induced | LED; 627 nm; 57 s<br>4 J/cm <sup>2</sup> on the scalp<br>or<br>Laser: 630 nm<br>88 s<br>4 J/cm <sup>2</sup> on the scalp          | Once a day for 7 days from 30 days after injection of 6-OHDA                                           | <ol style="list-style-type: none"> <li>Both laser and LED irradiation improved depression-like behavior, with LED being the better.</li> <li>Laser treatment increased serum IL-2 level and decreased serum TNF-<math>\alpha</math> and INF-<math>\gamma</math> levels.</li> <li>LED treatment decreased serum TNF-<math>\alpha</math> level, but not as robust as laser; LED treatment increased serum INF-<math>\gamma</math> level.</li> </ol> |
| O'Brien et al. [91] (2019)  | Male Sprague Dawley rat                | Injection of LPS induced                                     | LED; 670 nm; 88 s<br>Spot size: 10 cm <sup>2</sup><br>40.8 mW/cm <sup>2</sup> on the scalp<br>3.59 J/cm <sup>2</sup> on the scalp | Twice a day for 6 days after injection                                                                 | <ol style="list-style-type: none"> <li>Prevented dopaminergic cell loss in SNc induced by 10 <math>\mu</math>g LPS instead of 20 <math>\mu</math>g LPS.</li> <li>Behavior improvement was not related to the loss of dopaminergic cell in the SNc.</li> </ol>                                                                                                                                                                                     |
| Darlot et al. [95] (2016)   | Male macaque monkey (4 to 5 years old) | Injecting of MPTP induced                                    | Laser; 670 nm<br>Implantable fiber<br>10 mW<br>Total dose of 25 J (Dose 1) or 35 J (Dose 2)                                       | Received within 24 hours after each MPTP injection                                                     | <ol style="list-style-type: none"> <li>tPBM, especially total dose of 25 J, rescued clinical evaluation scores and improved behavioral activity.</li> <li>tPBM, especially total dose of 25 J, mitigated the loss of TH<sup>+</sup> cell and striatum TH<sup>+</sup> terminal in the bilateral SNc.</li> </ol>                                                                                                                                    |
| Hamilton et al. [31] (2019) | Human                                  | –                                                            | LED;<br>A helmet contains several LEDs (660, 810 and 850 nm)                                                                      | 1 or 2 times per day                                                                                   | <ol style="list-style-type: none"> <li>55% of the initial signs and symptoms of the six patients showed overall improvement, whereas 43% stayed the same and only 2% worsened after tPBM treatment.</li> </ol>                                                                                                                                                                                                                                    |
| Liebert et al. [29] (2021)  | Human (aged from 60 to 80)             | –                                                            | LED; transcranial, intranasal, neck and abdominal<br>PBM device containing several LEDs                                           | 3 times per week for week 1 to 4; 2 times per week for week 5 to 8; and once per week for week 9 to 12 | <ol style="list-style-type: none"> <li>Measures of mobility, cognition, dynamic balance and fine motor skills were improved with tPBM treatment for 12 weeks and up to one year.</li> </ol>                                                                                                                                                                                                                                                       |
| Hong et al. [32] (2021)     | Human (aged from 58 to 80)             | –                                                            | LED; 940 nm; 30 min<br>6 mW/cm <sup>2</sup>                                                                                       | 5 times per week for 2 weeks                                                                           | <ol style="list-style-type: none"> <li>Improved Unified Parkinson Disease Rating Scale scores, and the improvement persisted until the end of treatment.</li> <li>The beneficial effects still partially existed one week after the treatment stopped.</li> </ol>                                                                                                                                                                                 |
| Liebert et al. [30] (2022)  | Human                                  | –                                                            | Laser; 904 nm<br>Abdomen-neck<br>PBM (brain-gut axis)                                                                             | 3 times per week for 12 weeks                                                                          | <ol style="list-style-type: none"> <li>Improved a number of clinical signs of PD, including mobility, cognition, dynamic balance, spiral test, and sense of smell, with some being maintained for 45 weeks.</li> <li>Improvements varied from person to person.</li> </ol>                                                                                                                                                                        |
| McGee et al. [33] (2023)    | Human                                  | –                                                            | LED; 635 and 810 nm; 24 min                                                                                                       | 6 times per week for 12 weeks                                                                          | <ol style="list-style-type: none"> <li>Improved facial and lower-limb scores in MDS-UPDRS-III test.</li> </ol>                                                                                                                                                                                                                                                                                                                                    |
| Liebert et al. [34] (2023)  | Human                                  | –                                                            | Device 1:<br>Laser; 904 nm<br>50 Hz; 11 min<br>60 mW<br>Device 2:<br>LED; 670 and 810 nm; 12 min                                  | Usage of device 1 and device 2 together for 3 years                                                    | <ol style="list-style-type: none"> <li>Median values for mobility and cognition continued to improve to 2 years and slightly declined to 3-years.</li> <li>Participants who discontinued treatment after 1 year showed a decline in outcome measures.</li> </ol>                                                                                                                                                                                  |

**Table S6. Reports of tPBM used for MS in pre-clinical and clinical studies.**

| Authors/<br>year                | Animal/<br>species                        | Pathological<br>model                | Parameters of the<br>light used                                                                                  | Protocol                                                                                       | Effects                                                                                                                                                                               |
|---------------------------------|-------------------------------------------|--------------------------------------|------------------------------------------------------------------------------------------------------------------|------------------------------------------------------------------------------------------------|---------------------------------------------------------------------------------------------------------------------------------------------------------------------------------------|
| Duarte et<br>al. [98]<br>(2018) | Male<br>C57BL/6<br>mouse (7<br>weeks old) | Injection of<br>cuprizone<br>induced | Laser; 808 nm;<br>20 s<br>Spot size:<br>0.028 cm <sup>2</sup><br>1.78 W/cm <sup>2</sup><br>36 J/cm <sup>2</sup>  | Once a day for<br>3 days in the<br>third and fourth<br>weeks of<br>cuprizone<br>administration | 1. Improved motor coordination ability.<br>2. Inhibited the increase of serum lactate<br>dehydrogenase.<br>3. Attenuated demyelination.<br>4. Attenuated the activation of glia cell. |
| Silva et<br>al. [97]<br>(2020)  | Human                                     | –                                    | Laser; 808 nm;<br>360 s<br>Spot size:<br>0.127 cm <sup>2</sup><br>0.8 W/cm <sup>2</sup><br>287 J/cm <sup>2</sup> | Twice a week<br>for 12 weeks                                                                   | 1. Increased the level of serum<br>proinflammatory cytokine IL-10.                                                                                                                    |
| Silva et<br>al. [99]<br>(2022)  | Human                                     | –                                    | Laser; 808 nm;<br>360 s<br>Spot size:<br>0.127 cm <sup>2</sup><br>0.8 W/cm <sup>2</sup><br>287 J/cm <sup>2</sup> | Twice a week<br>for 12 weeks                                                                   | 1. Not significantly improved fatigue status<br>measured by modified fatigue impact scale.                                                                                            |

**Table S7. Reports of tPBM used for TBI in pre-clinical and clinical studies.**

| Authors/<br>year           | Animal/<br>species                | Pathological<br>model                                        | Parameters of the<br>light used                                                                                                                                                                                                                                                                                 | Protocol                                                                                                                    | Effects                                                                                                                                                                                                                                                                                                                                                                                      |
|----------------------------|-----------------------------------|--------------------------------------------------------------|-----------------------------------------------------------------------------------------------------------------------------------------------------------------------------------------------------------------------------------------------------------------------------------------------------------------|-----------------------------------------------------------------------------------------------------------------------------|----------------------------------------------------------------------------------------------------------------------------------------------------------------------------------------------------------------------------------------------------------------------------------------------------------------------------------------------------------------------------------------------|
| Oron et al. [114] (2007)   | Male sabra mouse                  | Closed head impact (CHI) (NSS 4-6)                           | Laser; 808 nm; 2 min<br>Spot diameter: 1.2 cm<br>10 (Dose 1) or 20 (Dose 2) mW/cm <sup>2</sup> on the cortex                                                                                                                                                                                                    | Single treatment from 4 hours after TBI                                                                                     | 1. tPBM with both doses improved NSS without significant difference observed.<br>2. Decreased the size of lesion region.                                                                                                                                                                                                                                                                     |
| Ando et al. [101] (2011)   | Male BALB/C mouse                 | Controlled cortical impact (CCI)                             | Laser; 810 nm; 12 min<br>50 mW/cm <sup>2</sup> on the scalp<br>36 J/cm <sup>2</sup> on the scalp<br>CW or PW 1(10 Hz) or PW 2(100 Hz)                                                                                                                                                                           | Single treatment from 4 hour after TBI                                                                                      | 1. tPBM (PW 2) improved NSS.<br>2. tPBM (PW 2) improved motor function and mitigated depression-like behavior.<br>3. tPBM (PW 2) not significantly recovered ATP level in trauma region.<br>4. tPBM (PW 1) mitigated the size of brain lesion region.                                                                                                                                        |
| Oron et al. [115] (2012)   | Male sabra mouse (2 months old)   | CHI                                                          | Laser; 808 nm; 2 min<br>Spot diameter: 1.2 cm<br>10 mW/cm <sup>2</sup> on the cortex<br>1.2 J/cm <sup>2</sup> on the cortex<br>CW or PW (100 or 600 Hz)                                                                                                                                                         | Single treatment                                                                                                            | 1. Both PW and CW modes of treatment decreased the size of lesion region and improved NSS.<br>2. 100 Hz-PW light had a better NSS improvement than both 600 Hz-PW and CW light treatment.                                                                                                                                                                                                    |
| Khuman et al. [112] (2012) | Male C57BL/6 mouse (3 months old) | CCI with craniotomy                                          | Laser; 800 nm<br>Spot size: 1.32 cm <sup>2</sup><br>Craniotomy: 30 J/cm <sup>2</sup> (dose 1) or 60 J/cm <sup>2</sup> (dose 2) or 105 J/cm <sup>2</sup> (dose 3) or 120 J/cm <sup>2</sup> (dose 4) or 210 J/cm <sup>2</sup> (dose 5) on the cortex<br>Transcranial: 60 J/cm <sup>2</sup> (dose 6) on the cortex | Once a day for 1 (scheme 1) or 7 days (scheme 2) from 60-80 min after TBI                                                   | 1. Single craniotomy and transcranial laser irradiation with dose of 60 J/cm <sup>2</sup> improved motor and memory functions.<br>2. Single craniotomy and transcranial laser irradiation with dose of 60 J/cm <sup>2</sup> inhibited the activation of microglia, but had no beneficial effects on lesion size, edema degree and brain nitrotyrosine level.                                 |
| Wu et al. [102] (2012)     | Male BALB/C mouse                 | CHI                                                          | Laser; 4 min<br>660 or 730 or 810 or 980 nm<br>150 mW/cm <sup>2</sup> on the scalp<br>36 J/cm <sup>2</sup> on the scalp                                                                                                                                                                                         | Single treatment from 4 hours after TBI                                                                                     | 1. tPBM at 660 and 810 nm improved NSS during follow up period.<br>2. tPBM with 660 and 810 nm decreased the size of brain lesion region.                                                                                                                                                                                                                                                    |
| Xuan et al. [103] (2013)   | Male BALB/C mouse (6-8 weeks old) | Moderate to severe cortical impact (NSS 7-8) with craniotomy | Laser; 810 nm; 12 min<br>Spot diameter: 1 cm<br>25 mW/cm <sup>2</sup> on the scalp<br>18 J/cm <sup>2</sup> on the scalp                                                                                                                                                                                         | Single treatment (scheme 1) or once a day for 3 days (scheme 2) or once a day for 14 days (scheme 3) from 4 hours after TBI | 1. tPBM for 3 days improved NSS, but got worse for 14 days.<br>2. tPBM for 3 days improved motor function in wire-grip and motion tests.<br>3. tPBM for 3 days decreased the size of lesion region.<br>4. tPBM for 3 days mitigated neuronal degeneration and promoted neurogenesis from 4 weeks after TBI.                                                                                  |
| Xuan et al. [104] (2014)   | Male BALB/C mouse (8 weeks old)   | Moderate to severe cortical impact (NSS 7-8) with craniotomy | Laser; 810 nm; 12 min<br>Spot diameter: 1 cm<br>25 mW/cm <sup>2</sup> on the scalp<br>18 J/cm <sup>2</sup> on the scalp                                                                                                                                                                                         | Single treatment (scheme 1) or once a day for 3 days from 4 hours after TBI (scheme 2)                                      | 1. tPBM (scheme 2) improved motor and memory functions.<br>2. tPBM (scheme 2) inhibited the level of Caspase-3 in lesion region from 4 days after TBI.<br>3. tPBM (scheme 2) increased the number of BrdU/NeuN <sup>+</sup> cells in the hippocampus from 28 days after TBI.<br>4. tPBM (scheme 2) increased the expression level of neuron tubulin (e.g. DCX and TUJ-1) in the hippocampus. |
| Zhang et al. [108] (2014)  | Wild-type mouse and IEX-1         | Mild cortical impact (NSS)                                   | Laser; 810 nm; 4 min<br>10 Hz (50%)                                                                                                                                                                                                                                                                             | Single treatment from 4 hours after TBI                                                                                     | 1. Downregulated the level of IL-6, but upregulated the level of TNF- $\alpha$ .<br>2. Rescued NSS and the size of brain damage.                                                                                                                                                                                                                                                             |

|                               |                                   |                                                              |                                                                                                                                  |                                                                                        |                                                                                                                                                                                                                                                                                                                                                                                                                                                                      |
|-------------------------------|-----------------------------------|--------------------------------------------------------------|----------------------------------------------------------------------------------------------------------------------------------|----------------------------------------------------------------------------------------|----------------------------------------------------------------------------------------------------------------------------------------------------------------------------------------------------------------------------------------------------------------------------------------------------------------------------------------------------------------------------------------------------------------------------------------------------------------------|
|                               | knockout mouse (8 weeks old)      | ~5) with craniotomy                                          | 150 mW/cm <sup>2</sup> on the scalp<br>36 J/cm <sup>2</sup> on the scalp                                                         |                                                                                        | 3. Inhibited apoptosis and leukocyte infiltration in the cortex and hippocampus.<br>4. Increased ATP level in the impact region, which is correlated to NSS.                                                                                                                                                                                                                                                                                                         |
| Xuan et al. [105] (2015)      | Male BALB/C mouse (6-8 weeks old) | Moderate to severe cortical impact (NSS 7-8) with craniotomy | Laser; 810 nm; 12 min<br>Spot diameter: 1 cm<br>50 mW/cm <sup>2</sup> on the scalp<br>36 J/cm <sup>2</sup> on the scalp          | Single treatment (scheme 1) or once a day for 3 days (scheme 2) from 4 hours after TBI | 1. tPBM (scheme 2) increased the BDNF level in the DG and SVZ regions 7 days after TBI.<br>2. tPBM (scheme 2) increased the expression of synapsin-1 in the lesion cortex and SVZ.                                                                                                                                                                                                                                                                                   |
| Dong et al. [109] (2015)      | C57BL/6 mouse (8 weeks old)       | CHI (NSS 5-6)                                                | Laser; 810 nm; 4 min<br>10 Hz (50%)<br>150 mW/cm <sup>2</sup> on the scalp<br>36 J/cm <sup>2</sup> on the scalp                  | Single treatment from 4 hours after TBI                                                | 1. tPBM combined with lactic acid or pyruvate treatment further increased ATP level, but did not affect ROS level.<br>2. tPBM combined with lactic acid or pyruvate treatment further decreased the size of lesion area, improved the memory function, and mitigated neuronal injury and inflammation.                                                                                                                                                               |
| Xuan et al. [106] (2016)      | Male BALB/C mouse (6-8 weeks old) | Moderate to severe cortical impact (NSS 7-8) with craniotomy | Laser; 810 nm; 12 min<br>Spot diameter: 1 cm<br>25 mW/cm <sup>2</sup> on the scalp<br>18 J/cm <sup>2</sup> on the scalp          | Once a day for 3 days (scheme 1) or 14 days (scheme 2) from 4 hours after TBI          | 1. tPBM (scheme 1) improved neurological scores, memory function and the size of lesion, but got worse with scheme 2.<br>2. tPBM (scheme 2) temporarily inhibited the brain repair process by increasing the number of activated astrocytes.                                                                                                                                                                                                                         |
| Shemesh et al. [107] (2022)   | Female mouse (12 weeks old)       | CHI                                                          | Laser; 810 nm; 15 min<br>Spot size: 4 cm <sup>2</sup><br>50 mW/cm <sup>2</sup> on the scalp<br>45 J/cm <sup>2</sup> on the scalp | Single treatment from 10 min after TBI                                                 | 1. Inhibited the development of complications in the injured mouse by increasing blood flow, blood saturation and overall oxygen consumption levels over the injured area.                                                                                                                                                                                                                                                                                           |
| Moreira et al. [113] (2009)   | Male Wistar rat                   | Cortex cryogenic brain trauma                                | Laser;<br>660 or 780 nm<br>PW mode<br>3 J/cm <sup>2</sup> (dose 1) or 5 J/cm <sup>2</sup> (dose 2)                               | Double treatment: one immediately after brain injury and the other 3 hours later       | 1. 660 nm-tPBM with dose 2 decreased IL-1 $\beta$ level in brain tissue, but 780 nm-tPBM with dose 1 increased its level.<br>2. tPBM (660 nm with both dose, and 780 nm with dose 2) increased serum TNF- $\alpha$ and IL-6 levels.                                                                                                                                                                                                                                  |
| Quirk et al. [111] (2012)     | Sprague-Dawley rat                | CCI with craniotomy                                          | LED; 670 nm; 5 min<br>50 mW/cm <sup>2</sup> on the scalp<br>1.5 J/cm <sup>2</sup> on the scalp                                   | Twice a day for 3 days (biochemical analysis) or 10 days (behavior test)               | 1. Improved motor function.<br>2. Decreased Bax pro-apoptotic marker, increased Bcl-2 anti-apoptotic marker, and reduced glutathione level.                                                                                                                                                                                                                                                                                                                          |
| Esenaliev et al. [100] (2018) | Male Sprague-Dawley rat           | Blast brain injury induced                                   | Laser; 808 nm; 5 min<br>300 J/cm <sup>2</sup> on scalp<br>PW mode: 20 Hz                                                         | Single treatment from 1 hour after TBI                                                 | 1. Improved motor function.<br>2. Downregulated apoptosis genes (e.g. Bax, Caspase-3) and increased BDNF expression in the cortex and hippocampus.<br>3. Inhibited the activation of microglia and promoted the proliferation of neuronal progenitor cells from 10 days after TBI in the cortex.                                                                                                                                                                     |
| Mocciaro et al. [110] (2020)  | Male Sprague-Dawley rat           | Fluid percussion injury with craniotomy                      | Laser; 808 nm; 5 min<br>300 J/cm <sup>2</sup> on the scalp<br>PW mode: 20 Hz                                                     | Single treatment from 1 hour after TBI                                                 | 1. Improved the motor and cognitive functions.<br>2. Decreased impaired maturation and aberrant migration of neural progenitors in the DG.<br>3. Prevented upregulation of specific microRNAs in neural stem cells.                                                                                                                                                                                                                                                  |
| Yang et al. [116] (2020)      | Male Sprague-Dawley rat           | Repeated CHI (three times, with an interval of 5 days)       | Laser; 808 nm; 2 min<br>25 mW/cm <sup>2</sup> on the cortex<br>350 mW/cm <sup>2</sup> on the scalp                               | Single treatment for 15 days from 2 hours after TBI                                    | 1. Improved NSS, motor function, depression-like behavior, memory and social interaction.<br>2. Mitigated the downregulation of synaptic proteins (e.g. synaptophysin).<br>3. Inhibited neuronal injury in the cortex and hippocampus.<br>4. Inhibited gliosis and increased the IL-1 $\beta$ and IL-10 levels.<br>5. Increased the number of NeuN <sup>+</sup> cells, decreased the number of TUNEL <sup>+</sup> cells, and decreased the activity of Caspase-9 and |

|                                   |       |                    |                                                                                                                                                                                             |                                                                                                    |                                                                                                                                                                                                                                                     |
|-----------------------------------|-------|--------------------|---------------------------------------------------------------------------------------------------------------------------------------------------------------------------------------------|----------------------------------------------------------------------------------------------------|-----------------------------------------------------------------------------------------------------------------------------------------------------------------------------------------------------------------------------------------------------|
| Naeser et al. [38] (2011)         | Human | Chronic TBI        | LED arrays including several red diodes (633 nm) and NIR diodes (870 nm)                                                                                                                    | Once a week for 8 weeks (patient 1)<br>Once a day for 9 months (patient 2)                         | Caspase-3.<br>1. tPBM for 8 weeks improved attention time from 20 min to 3 hours.<br>2. tPBM for 9 months improved executive and memory functions, and reduced the post-traumatic stress disorders.                                                 |
| Nawashiro et al. [40] (2012)      | Human | Severe head trauma | LED; 850 nm;<br>30 min<br>Spot size: 21.85 cm <sup>2</sup><br>11.4 mW/cm <sup>2</sup> on the scalp<br>20.5 J/cm <sup>2</sup> on the scalp                                                   | Twice a day for 73 days from 228 days after TBI                                                    | 1. tPBM for 5 days improved motor function.<br>2. tPBM for 73 days increased 20% local CBF in left prefrontal lobe.                                                                                                                                 |
| Naeser et al. [36] (2014)         | Human | Mild TBI           | A device contains 9 red diodes (633 nm) and 52 NIR diodes (870 nm);<br>10 min                                                                                                               | 3 times per week for 6 weeks                                                                       | 1. Improved executive function and cognitive performance.                                                                                                                                                                                           |
| Naeser et al. [37] (2016)         | Human | Chronic TBI        | tPBM:<br>LED<br>Intranasal PBM:<br>Red LED (633 nm<br>8 mW/cm <sup>2</sup> ) and<br>NIR LED (810 nm<br>14.2 mW/cm <sup>2</sup> )                                                            | 3 times per week for 6 weeks                                                                       | 1. Both tPBM and intranasal PBM treatments improved sleep (on average one additional hour per night) in chronic TBI cases.                                                                                                                          |
| Chao et al. [35] (2020)           | Human | Moderate TBI       | LED; 810 nm;<br>10 min<br>Power density of posterior, anterior and intranasal LEDs are 100, 75, and 25 mW/cm <sup>2</sup> respectively.<br>PW mode:<br>10 Hz (device 1)<br>40 Hz (device 2) | Every other day for 8 weeks, alternating device 1 and device 2 depending on the patient's response | 1. Improved language learning, memory and executive functions; mitigated headache symptom.<br>2. Enhanced brain functional connectivity.<br>3. Increased the perfusion in gray matter, frontal lobe, temporal lobe, occipital lobe and hippocampus. |
| Figueiro Longo et al. [39] (2020) | Human | Moderate TBI       | LED; 810 nm;<br>20 min<br>36 mW/cm <sup>2</sup> on the scalp<br>43 J/cm <sup>2</sup> on the scalp                                                                                           | Triple treatments from 72 hours after TBI, each more than 12 hours apart                           | 1. Promoted neuroreactivity in white matter tracts.<br>2. No adverse reactions were observed.                                                                                                                                                       |

**Table S8. A report of tPBM used for Possible CTE in a clinical study.**

| Authors/<br>year           | Patients information                                                                                                                                                                                                                                                                                                                                                                                                                                                        | Device                                                                                                                                                                                                                                                                                 | Protocol                                                                                                          | Effects                                                                                                                                                                                                                                                                                                                                                                                                                  |
|----------------------------|-----------------------------------------------------------------------------------------------------------------------------------------------------------------------------------------------------------------------------------------------------------------------------------------------------------------------------------------------------------------------------------------------------------------------------------------------------------------------------|----------------------------------------------------------------------------------------------------------------------------------------------------------------------------------------------------------------------------------------------------------------------------------------|-------------------------------------------------------------------------------------------------------------------|--------------------------------------------------------------------------------------------------------------------------------------------------------------------------------------------------------------------------------------------------------------------------------------------------------------------------------------------------------------------------------------------------------------------------|
| Naeser et al. [117] (2023) | American-style ex-football players<br>Case 1:<br>65 years old with emotional outbursts, depression, cognitive problems, poor memory and poor sleep<br>Case 2:<br>55 years old with emotional outbursts, cognitive problems and poor memory<br>Case 3:<br>57 years old with emotional outbursts, depression, cognitive problems, poor memory, poor sleep, chronic pain and tinnitus<br>Case 4:<br>74 years old with emotional outbursts, cognitive problems and chronic pain | Device A:<br>In-Office<br>MedX Health LED device (633 and 870 nm; 40 min)<br>Device B:<br>At-Home<br>Neuro Gamma device (810 nm; 20 min) and Vielight intranasal LED device (633 nm; 25 min)<br>Device C:<br>In-Office<br>THOR Photomedicine LED lined helmet (660 and 850 nm; 23 min) | Treated with device A or C 3 times per week for 6 weeks, followed by device B treatment at home, 6 times per week | 1. Improved executive function, attention, PTSD, pain and sleep. This was significantly correlated to the increase of SN functional connectivity.<br>2. Improved verbal learning/memory and depression. This was correlated to the increase of CEN functional connectivity.<br>3. Increased n-acetyl-aspartate (oxygen consumption, mitochondria) in anterior cingulate cortex. This was parallel to less pain and PTSD. |

**Table S9. Reports of tPBM used for depression in pre-clinical and clinical studies.**

| Authors/<br>year              | Animal/<br>species                 | Pathological<br>model                                                             | Parameters of the<br>light used                                                                                                              | Protocol                                           | Effects                                                                                                                                                                                                                                                                                                                                                                                                                                                           |
|-------------------------------|------------------------------------|-----------------------------------------------------------------------------------|----------------------------------------------------------------------------------------------------------------------------------------------|----------------------------------------------------|-------------------------------------------------------------------------------------------------------------------------------------------------------------------------------------------------------------------------------------------------------------------------------------------------------------------------------------------------------------------------------------------------------------------------------------------------------------------|
| Xu et al. [121] (2017)        | Male ICR mouse                     | Movement restriction induced and Abelson helper integration site-1 knockout model | Laser; 808 nm; 30 min<br>Spot diameter: 1 cm<br>23 mW/cm <sup>2</sup> on the scalp                                                           | Once a day for 28 days                             | 1. Improved depression-like behavior.<br>2. Rescued the decline of ATP level in prefrontal cortex region.<br>3. Increased the activity and level of mitochondrial complex IV in the prefrontal cortex.                                                                                                                                                                                                                                                            |
| Salehpour et al. [118] (2018) | Male BALB/C mouse                  | Sleep deprivation induced                                                         | Laser; 810 nm; 5 s<br>PW mode: 10 Hz (88%)<br>Spot size: 0.03 cm <sup>2</sup><br>8 J/cm <sup>2</sup> on the cortex                           | Once a day for 3 days                              | 1. Prevented cognitive impairment.<br>2. Enhanced the antioxidant status and increased mitochondrial activity in the hippocampus.                                                                                                                                                                                                                                                                                                                                 |
| Salehpour et al. [119] (2019) | Male BALB/C mouse (8-10 weeks old) | Subchronic restraint stress induced                                               | Laser; 810 nm; 5 s<br>10 Hz (88%)<br>Spot size: 0.03 cm <sup>2</sup><br>33.3 J/cm <sup>2</sup> on the scalp                                  | Once a day for 5 days                              | 1. Improved depression-like behavior.<br>2. Decreased lipid peroxidation.<br>3. Enhanced total antioxidant capacity and glutathione levels, glutathione peroxidase and superoxide dismutase activity.<br>4. Decreased nuclear factor kB, p38, and JNK levels in the hippocampus and cortex.<br>5. Downregulated intrinsic apoptosis biomarkers (e.g. BAX, Bcl-2, and caspase-3).<br>6. Decreased serum cortisol, corticosterone, TNF- $\alpha$ , and IL-6 levels. |
| Farazi et al. [120] (2022)    | Male BALB/C mouse                  | 110 dB white noise induced                                                        | Laser; 810 nm; 5 s<br>PW mode: 10 Hz (88%)<br>4.75 W/cm <sup>2</sup> on the scalp<br>8 J/cm <sup>2</sup> on the cortex                       | Once a day for 14 days                             | 1. Improved depression-like behavior in forced swimming, elevated plus maze and open field tests.<br>2. Upregulated the BDNF/tyrosine receptor kinase B/CREB signaling pathway in the hippocampus.<br>3. Reduced serum corticosterone level.                                                                                                                                                                                                                      |
| Wu et al. [122] (2012)        | Male Wistar rat                    | Variety of mild unpredictable stressors for a total of 8 weeks induced            | Laser; 810 nm; 2 min<br>15 mW/cm <sup>2</sup> on the cortex<br>PW mode: 100 Hz (20%)                                                         | 3 times per week for 3 weeks                       | 1. Improved depression-like behavior without significant difference compared to fluoxetine treatment.                                                                                                                                                                                                                                                                                                                                                             |
| Mohammed et al. [124] (2016)  | Male Rattus norvegicus rat         | Injection of reserpine induced                                                    | Laser; 804 nm; 6 min<br>Spot size: 0.13 cm <sup>2</sup><br>0.64 or 1.60 or 3.18 mW/cm <sup>2</sup>                                           | Once a day for 14 days                             | 1. tPBM (0.64 W/cm <sup>2</sup> ) decreased immobile time, and increased swimming and climbing abilities.<br>2. tPBM (3.18 W/cm <sup>2</sup> ) deteriorated behavior function.<br>3. tPBM (0.64 W/cm <sup>2</sup> ) mitigated the decline of Delta frequency band and increase of Beta-1 and Beta-2 frequency bands.                                                                                                                                              |
| Salehpour et al. [123] (2016) | Male Wistar rat (12 weeks old)     | Chronic mild stress model induced by exposing to stressors over several weeks     | Laser; 630 or 810 nm<br>Spot size: 0.07 cm <sup>2</sup><br>PW mode: 10 Hz (50%)<br>1.18 J/cm <sup>2</sup> on the cortex for both wavelengths | 4 times per week for 3 weeks                       | 1. tPBM (810 nm) improved depression-like behavior and elevated body weight.<br>2. tPBM decreased serum cortisol level and increased blood sugar level.                                                                                                                                                                                                                                                                                                           |
| Li et al. [125] (2021)        | Male Sprague-Dawley rat            | PTSD model induced by underwater trauma                                           | Laser; 808 nm<br>Spot size: 1.5 cm <sup>2</sup><br>25 mW/cm <sup>2</sup> on the cortex<br>3 J/cm <sup>2</sup> on the cortex                  | Once a day for 7 days                              | 1. Improved anxiety-like behavior, depression-like behavior, and cognitive dysfunction.<br>2. Regulated Arc and c-fos expression in the hippocampus and amygdala.<br>3. Boosted ATP production and regulated protein expression in the hippocampus.                                                                                                                                                                                                               |
| Yang et al. [126] (2021)      | Male Fischer 334 rat               | TgF344-AD transgenic model                                                        | Laser; 808 nm; 2 min<br>350 mW/cm <sup>2</sup> on the scalp and 25                                                                           | 3 times per week for 8 months from age of 2 months | 1. Improved anxiety and depression-like behavior.<br>2. Inhibited neuronal apoptosis and damage in the cortex.<br>3. Alleviated mitochondria fragmentation and                                                                                                                                                                                                                                                                                                    |



|                             |       |   |                                                                                                                                            |                                          |                                                                                                                                                                                                                                                                                         |
|-----------------------------|-------|---|--------------------------------------------------------------------------------------------------------------------------------------------|------------------------------------------|-----------------------------------------------------------------------------------------------------------------------------------------------------------------------------------------------------------------------------------------------------------------------------------------|
|                             |       |   | mW/cm <sup>2</sup> on the cortex<br>42 J/cm <sup>2</sup> on the scalp and 3 J/cm <sup>2</sup> on the cortex                                |                                          | rescued the decline of CCO activity and ATP level.<br>4. Inhibited the activation of microglia, and decreased the expression of proinflammatory cytokines (e.g. TNF- $\alpha$ ).<br>5. Enhanced total antioxidant capacity and reduced the expression of malondialdehyde in the cortex. |
| Schiffer et al. [42] (2009) | Human | – | LED; 810 nm<br>4 positions each for 4 min<br>250 mW/cm <sup>2</sup> on the scalp and 9.5 mW/cm <sup>2</sup> on the cortex                  | 2 weeks (scheme 1) or 4 weeks (scheme 2) | 1. tPBM (scheme 1) not significantly increased mean rCBF across hemispheres.<br>2. tPBM (scheme 2) improved HAM-D and HAM-A.                                                                                                                                                            |
| Disner et al. [41] (2016)   | Human | – | Laser; 1064 nm;<br>4 min<br>Spot size:<br>13.6 cm <sup>2</sup><br>250 mW/cm <sup>2</sup> on the scalp<br>60 J/cm <sup>2</sup> on the scalp | Double treatments with 48 hours apart    | 1. Enhanced the therapeutic effect of ABM.                                                                                                                                                                                                                                              |
| Cassano et al. [43] (2018)  | Human | – | LED; 823 nm;<br>20-30 min<br>Spot size:<br>28.7 cm <sup>2</sup><br>33.2 mW/cm <sup>2</sup>                                                 | Twice a week for 8 weeks                 | 1. Improved the baseline observation carried forward, last observation carried forward based on the change in HAM-D <sub>17</sub> total scores.                                                                                                                                         |
| Kerppers et al. [44] (2020) | Human | – | LED; 945 nm;<br>85 s<br>9.25 J/cm <sup>2</sup> on the scalp                                                                                | Once a day for 30 days                   | 1. Improved HAD scale scores.<br>2. Improved the performance in memory and drawings tests, but had no beneficial effect in strength test.                                                                                                                                               |

**Table S10. Reports of tPBM used for aging in pre-clinical and clinical studies.**

| Authors/<br>year                          | Animal/<br>species       | Pathological<br>model                                               | Parameters of the<br>light used                                                                                                                                                                | Protocol                                                       | Effects                                                                                                                                                                                                                                                                                                                           |
|-------------------------------------------|--------------------------|---------------------------------------------------------------------|------------------------------------------------------------------------------------------------------------------------------------------------------------------------------------------------|----------------------------------------------------------------|-----------------------------------------------------------------------------------------------------------------------------------------------------------------------------------------------------------------------------------------------------------------------------------------------------------------------------------|
| Michalik<br>ova et al.<br>[131]<br>(2008) | Female<br>CD1 mouse      | Natural aging<br>(12 months old)                                    | Laser; 1072 nm;<br>6 min                                                                                                                                                                       | Once a day for<br>10 days                                      | 1. Rescued the memory impairment in 3D-<br>maze test.                                                                                                                                                                                                                                                                             |
| Salehpou<br>r et al.<br>[127]<br>(2017)   | Male<br>BALB/C<br>mouse  | Injection of D-<br>galactose<br>induced                             | Laser;<br>660 or 810 nm<br>PW mode:<br>10 Hz (88%)<br>4.75 W/cm <sup>2</sup> on the<br>scalp<br>4 or 8 J/cm <sup>2</sup> on the<br>cortex surface                                              | 3 times per<br>week during<br>model<br>establishment<br>period | 1. Red and NIR laser at high dose (8 J/cm <sup>2</sup> )<br>mitigated cognitive impairment and<br>improved active mitochondria level,<br>mitochondrial membrane potential level,<br>ATP level, and CCO activity.<br>2. Red and NIR laser at high dose (8 J/cm <sup>2</sup> )<br>decreased Bax/Bcl-2, Caspase-3 and ROS<br>levels. |
| Massri et<br>al. [132]<br>(2018)          | Male<br>C57BL/6<br>mouse | Natural aging<br>(12 months old)                                    | LED; 670 nm;<br>20 min                                                                                                                                                                         | Once a day for<br>8 months from<br>age of 5 months             | 1. Reduced the number and volume of striatal<br>astrocytes.<br>2. Reduced the number of microglia in<br>striatum.                                                                                                                                                                                                                 |
| Salehpou<br>r et al.<br>[130]<br>(2018)   | Male<br>BALB/C<br>mouse  | Natural aging<br>(18 months old)                                    | Laser; 660 nm;<br>15 s<br>Spot size:<br>0.03 cm <sup>2</sup><br>6.66 W/cm <sup>2</sup> on the<br>scalp<br>99.9 J/cm <sup>2</sup> on the<br>scalp                                               | Once a day for<br>2 weeks                                      | 1. Improved spatial memory and anxiety-like<br>behaviors.<br>2. Increased ATP level in the hippocampus.                                                                                                                                                                                                                           |
| Salehpou<br>r et al.<br>[128]<br>(2019)   | Male<br>BALB/C<br>mouse  | Injection of D-<br>galactose<br>induced                             | Laser; 660 nm;<br>15 s<br>Spot size:<br>0.03 cm <sup>2</sup><br>6.66 W/cm <sup>2</sup> on the<br>scalp<br>99.9 J/cm <sup>2</sup> on the<br>scalp and 16 J/cm <sup>2</sup><br>on the cortex     | Once a day for<br>2 weeks                                      | 1. Improved spatial memory and anxiety-like<br>behaviors.<br>2. Increased ATP level in the hippocampus.                                                                                                                                                                                                                           |
| Hosseini<br>et al.<br>[129]<br>(2022)     | Male<br>BALB/C<br>mouse  | Injection of D-<br>galactose and<br>aluminum<br>chloride<br>induced | Laser; 810 nm<br>Spot size:<br>0.03 cm <sup>2</sup><br>4.75 W/cm <sup>2</sup> on the<br>scalp<br>8 or 16 or 32<br>J/cm <sup>2</sup> on the<br>cortex                                           | 3 times per<br>week for 2<br>months                            | 1. Mitigated social and spatial memory<br>impairments.<br>2. Inhibited the down-regulation of growth-<br>associated protein 43 and synaptophysin.<br>3. Decreased the expression of<br>proinflammatory cytokines (e.g., TNF- $\alpha$<br>and IL-6).                                                                               |
| Cardoso<br>et al.<br>[134]<br>(2021)      | Male<br>Wistar rat       | Natural aging<br>(20 months old)                                    | Laser; 810 nm;<br>30 s<br>Spot size:<br>0.028 cm <sup>2</sup><br>3.57 W/cm <sup>2</sup> on the<br>scalp and 17<br>mW/cm <sup>2</sup> on the<br>cortex<br>107 J/cm <sup>2</sup> on the<br>scalp | Once a day for<br>58 days                                      | 1. Increased cortical intracellular signaling<br>proteins related to cell proliferation and cell<br>survival.<br>2. Increased the expression of p70 ribosomal<br>protein S6 kinase, signal transducer,<br>activator of transcription 3 and the<br>activation of Akt in the hippocampus.                                           |
| Cardoso<br>et al.<br>[133]<br>(2022)      | Male<br>Wistar rat       | Natural aging<br>(20 months old)                                    | Laser; 810 nm;<br>30 s<br>Spot size:<br>0.025 cm <sup>2</sup><br>4.06 W/cm <sup>2</sup> on the<br>scalp                                                                                        | Once a day for<br>58 days                                      | 1. Reversed age-related decrease in regional<br>brain CCO activity and the impairment of<br>systems-level functional connectivity.                                                                                                                                                                                                |
| Cardoso<br>et al.<br>[135]<br>(2022)      | Male<br>Wistar rat       | Natural aging<br>(20 months old)                                    | Laser; 810 nm;<br>30 s<br>Spot size:<br>0.028 cm <sup>2</sup><br>3.57 W/cm <sup>2</sup> on the<br>scalp and 17<br>mW/cm <sup>2</sup> on the<br>cortex<br>107 J/cm <sup>2</sup> on the<br>scalp | Once a day for<br>28 days                                      | 1. Improved spatial learning and memory<br>abilities.<br>2. Increased IL-6, TNF- $\alpha$ and IL-10 levels and<br>decreased IL-5 level in the cortex.<br>3. Decreased IP-10 and fractalkine levels in<br>the hippocampus.                                                                                                         |
| Cardoso<br>et al.                         | Male<br>Wistar rat       | Natural aging<br>(20 months old)                                    | Laser; 660 nm;<br>30 s<br>Spot size:                                                                                                                                                           | Once a day for<br>10 days                                      | 1. Increased IL-1 $\alpha$ level and decreased IL-5<br>level in the cortex.<br>2. Increased IL-1 $\alpha$ level and decreased IL-5,                                                                                                                                                                                               |

|                            |       |               |                                                                                                                                                                                                       |                                                                             |                                                                                                                                                                                 |
|----------------------------|-------|---------------|-------------------------------------------------------------------------------------------------------------------------------------------------------------------------------------------------------|-----------------------------------------------------------------------------|---------------------------------------------------------------------------------------------------------------------------------------------------------------------------------|
| [136]<br>(2022)            |       |               | 0.03 cm <sup>2</sup><br>3.33 mW/cm <sup>2</sup>                                                                                                                                                       |                                                                             | IL-18 and fractalkine levels in the hippocampus.<br>3. Activated intracellular signaling proteins linked to vascular function and cell survival.                                |
| Salgado et al. [46] (2015) | Human | Aged over 60  | LED; 627 nm<br>70 mW/cm <sup>2</sup> on the scalp<br>40 J/cm <sup>2</sup> on the cortex                                                                                                               | Twice a week for 4 weeks                                                    | 1. Increased systolic and diastolic velocity of the left middle cerebral and basilar arteries.<br>2. Decreased pulsatility index and resistance index in the cerebral arteries. |
| Vargas et al. [45] (2017)  | Human | Aged 49-90    | Laser; 1064 nm<br>Spot size:<br>13.6 cm <sup>2</sup><br>250 mW/cm <sup>2</sup> on the forehead<br>120 J/cm <sup>2</sup> on the forehead                                                               | Once a week for 5 weeks                                                     | 1. Mitigated attention and memory impairments.<br>2. Increased resting-state EEG alpha, beta, and gamma power.<br>3. Promoted more efficient prefrontal BOLD fMRI response.     |
| Chan et al. [48] (2019)    | Human | Aged over 60  | A device contains several red diodes (633 nm) and NIR diodes (870 nm);<br>7.5 min<br>Spot size:<br>22.48 cm <sup>2</sup><br>44.4 mW/cm <sup>2</sup> on the scalp<br>20 J/cm <sup>2</sup> on the scalp | Single treatment                                                            | 1. Improved action selection and inhibition abilities in flanker test.<br>2. Improved mental by flexibility flanker test.                                                       |
| Chan et al. [49] (2021)    | Human | Not mentioned | LED; 810 nm;<br>350 s<br>20 mW/cm <sup>2</sup> on the scalp<br>7 J/cm <sup>2</sup> on the scalp                                                                                                       | Single treatment                                                            | 1. Improved visual memory performance and reduced the hemodynamic response during the test.                                                                                     |
| Saucedo et al. [47] (2021) | Human | Aged 45-85    | Laser; 1064 nm<br>Spot size:<br>13.6 cm <sup>2</sup><br>250 mW/cm <sup>2</sup> on forehead<br>120 J/cm <sup>2</sup> on forehead                                                                       | Single treatment                                                            | 1. Increased CCO level during irradiation, followed by a significant post simulation increase in oxygenated hemoglobin and a decrease in deoxygenated hemoglobin.               |
| Qu et al. [50] (2022)      | Human | Aged 50-77    | Laser; 1064 nm;<br>12 min<br>0.25 W/cm <sup>2</sup>                                                                                                                                                   | Single treatment (scheme 1) or once a day for 7 consecutive days (scheme 2) | 1. tPBM with both schemes improved working memory of older adults, and the improvement of scheme 2 was better.<br>2. The beneficial effect of scheme 2 lasted at least 3 weeks. |

**Table S11. Reports of tPBM used for epilepsy in pre-clinical studies.**

| Authors/<br>year           | Animal/<br>species               | Pathological<br>model                 | Parameters of the<br>light used                                                                                                           | Protocol                                                        | Effects                                                                                                                                                                                                                                                                                                                                                                                                                                                                                                          |
|----------------------------|----------------------------------|---------------------------------------|-------------------------------------------------------------------------------------------------------------------------------------------|-----------------------------------------------------------------|------------------------------------------------------------------------------------------------------------------------------------------------------------------------------------------------------------------------------------------------------------------------------------------------------------------------------------------------------------------------------------------------------------------------------------------------------------------------------------------------------------------|
| Hong et al. [141] (2022)   | Male C57BL/6 mouse (7 weeks old) | Injection of pilocarpine induced      | Laser; 830 nm; 12 min<br>50 mW/cm <sup>2</sup> on the scalp<br>22.9 J/cm <sup>2</sup> on the scalp                                        | Single treatment (scheme 1) or once a day for 5 days (scheme 2) | <ol style="list-style-type: none"> <li>1. tPBM (scheme 2) increased hilar interneuron population in the DG.</li> <li>2. tPBM (scheme 2) increased Ki-67<sup>+</sup> cell expression level in the DG 7 and 14 days after status epilepticus.</li> <li>3. tPBM (scheme 2) increased the number of NeuN<sup>+</sup>/BrdU<sup>+</sup> and DCX<sup>+</sup> cells in the DG 14 days after status epilepticus.</li> </ol>                                                                                               |
| Radwan et al. [138] (2009) | Male Rattus norvegicus rat       | Injection of pilocarpine induced      | Laser; 830 nm; 6 min<br>90 mW<br>32.4 J                                                                                                   | Once a day for 7 days                                           | <ol style="list-style-type: none"> <li>1. Returned the concentrations of glutamic acid, glutamine, glycine, and taurine to initial levels in the cortex.</li> <li>2. Returned the concentrations of aspartate, glycine to near-control values.</li> <li>3. Increased aspartate aminotransferase (ALT), alanine aminotransferase (AST) activity and glucose content in the cortex.</li> <li>4. Increased ALT and AST activity.</li> <li>5. Decreased the concentrations of glucose in the hippocampus.</li> </ol> |
| Tsai et al. [137] (2020)   | Sprague-Dawley rat (p30-36)      | Subcutaneous injection of PTZ induced | Laser; 808 nm; 100 s<br>Spot size: 0.0825 cm <sup>2</sup><br>1.333 W/cm <sup>2</sup> on the scalp<br>133.3 J/cm <sup>2</sup> on the scalp | Single treatment before PTZ injection                           | <ol style="list-style-type: none"> <li>1. Reduced mean seizure scores, incidence of status epilepticus and mortality.</li> <li>2. Reduced dark neurons in the cortex, hippocampus, thalamus and hypothalamus.</li> <li>3. Lessened the apoptotic ratio of parvalbumin (PV)-positive interneurons and alleviated the aberrant extent of PV-positive unstained soma of principal cells in the hippocampus.</li> </ol>                                                                                              |
| Vogel et al. [139] (2021)  | Male Wistar rat                  | Photothrombotic model                 | Laser; 780 nm; 2 min<br>Spot size: 0.12 cm <sup>2</sup><br>0.083 W/cm <sup>2</sup> on the scalp<br>10 J/cm <sup>2</sup> on the scalp      | 3 times per week for 8 weeks                                    | <ol style="list-style-type: none"> <li>1. Reduced electrographic seizure duration and spikes number in the cortex and ventral posteromedial thalamic nucleus.</li> </ol>                                                                                                                                                                                                                                                                                                                                         |
| Tsai et al. [140] (2022)   | Sprague-Dawley rat (p30-36)      | Subcutaneous injection of PTZ induced | Laser; 808 nm; 100 s<br>Spot size: 0.0825 cm <sup>2</sup><br>1.333 W/cm <sup>2</sup> on the scalp<br>133.3 J/cm <sup>2</sup> on the scalp | Single treatment before PTZ injection                           | <ol style="list-style-type: none"> <li>1. Reduced neuron-specific enolase immunoreactivity in the hippocampus CA3.</li> <li>2. Inhibited the activation of microglia and astrocytes.</li> <li>3. Enhanced hippocampal CCO oxidase subunit 1.</li> </ol>                                                                                                                                                                                                                                                          |
